# Supplementary material for: Applying Queuing Theory and Mixed Integer Programming to Blood Center Nursing Schedules of a Large Hospital in China
Source: Hindawi journal article supplement (doi:10.1155/2020/9373942), 2020-07-01
Supplement: f1 [file 9373942.f1.pdf]

**S1 Blood collection nurses working at each time of day**

| Date | Period | Nurse number                   | Date | Period | Nurse number                      |
|------|--------|--------------------------------|------|--------|-----------------------------------|
| 1    | 1      | 1, 4, 5, 6, 8, 10, 11, 17, 20  | 15   | 1      | 1, 2, 6, 8, 10, 11, 12, 16, 19    |
| 1    | 2      | 1, 5, 6, 8                     | 15   | 2      | 1, 10, 14, 15                     |
| 1    | 3      | 10, 11, 13                     | 15   | 3      | 2, 6, 11                          |
| 2    | 1      | 1, 3, 4, 6, 9, 11, 12, 14, 15  | 16   | 1      | 1, 3, 4, 5, 6, 7, 8, 9, 12, 15    |
| 2    | 2      | 1, 2, 7, 8                     | 16   | 2      | 3, 5, 10, 13, 14                  |
| 2    | 3      | 5, 11                          | 16   | 3      | 1, 13                             |
|      |        |                                |      |        | 1, 2, 3, 4, 6, 7, 8, 9, 12, 13,   |
| 3    | 1      | 2, 3, 7, 9, 11, 15, 16, 18, 20 | 17   | 1      | 14, 15                            |
| 3    | 2      | 3, 6, 10, 13                   | 17   | 2      | 2, 4, 5, 8                        |
| 3    | 3      | 8, 10                          | 17   | 3      | 5, 11, 14                         |
|      |        |                                |      |        | 1, 3, 4, 6, 7, 8, 10, 11, 13, 14, |
| 4    | 1      | 3, 6, 8, 9, 10, 11, 12, 15     | 18   | 1      | 15                                |
|      |        |                                |      |        | 1, 3, 4, 6, 7, 8, 10, 11, 13, 14, |
| 4    | 2      | 2, 4, 5, 13                    | 18   | 2      | 15                                |
| 4    | 3      | 10, 14                         | 18   | 3      | 12, 13, 14                        |
|      |        | 2, 3, 4, 7, 8, 10, 11, 12, 14, |      |        |                                   |
| 5    | 1      | 16, 17                         | 19   | 1      | 3, 4, 5, 8, 9, 11, 14, 15         |
| 5    | 2      | 5, 7, 9, 15                    | 19   | 2      | 3, 7, 13                          |
| 5    | 3      | 1, 10                          | 19   | 3      | 4, 12, 15                         |
| 6    | 1      | 4, 5, 7, 12, 13, 15            | 20   | 1      | 5, 6, 7, 11, 13                   |
| 6    | 2      | 9, 14                          | 20   | 2      | 1, 2, 3                           |
| 6    | 3      | 1                              | 20   | 3      | 10                                |
| 7    | 1      | 3, 4, 5, 8, 10, 13, 14         | 21   | 1      | 8, 10, 12, 14                     |
| 7    | 2      | 6, 7, 8                        | 21   | 2      | 1, 4, 6                           |
| 7    | 3      | 1                              | 21   | 3      | 2                                 |
| 8    | 1      | 2, 4, 6, 7, 9, 15, 16, 17, 18  | 22   | 1      | 4, 5, 6, 7, 8, 9, 12, 13          |
| 8    | 2      | 6, 16, 17, 18                  | 22   | 2      | 2, 3, 5, 11, 11, 15               |
| 8    | 3      | 9, 15                          | 22   | 3      | 1, 6                              |
|      |        | 3, 5, 9, 10, 11, 12, 16, 18,   |      |        |                                   |
| 9    | 1      | 19                             | 23   | 1      | 3, 6, 8, 9, 11, 13, 16, 18, 19    |
| 9    | 2      | 1, 3, 16, 18, 19               | 23   | 2      | 6, 10, 15                         |
| 9    | 3      | 2, 15                          | 23   | 3      | 10, 11                            |
|      |        |                                |      |        | 4, 7, 8, 9, 10, 11, 12, 14, 15,   |
| 10   | 1      | 6, 9, 10, 11, 12, 14, 16, 18   | 24   | 1      | 16, 12                            |
| 10   | 2      | 7, 17                          | 24   | 2      | 1, 2, 3, 5                        |
| 10   | 3      | 10, 11, 15                     | 24   | 3      | 10, 11, 13                        |
| 11   | 1      | 1, 2, 6, 10, 11, 12, 16, 17    | 25   | 1      | 2, 4, 9, 10, 11, 12, 14, 15       |
| 11   | 2      | 2, 3, 7, 8                     | 25   | 2      | 1, 5, 13                          |
| 11   | 3      | 1, 5, 15                       | 25   | 3      | 8, 11                             |
| 12   | 1      | 2, 4, 5, 8, 10, 13             | 26   | 1      | 1, 3, 7, 9, 10, 11, 12, 15        |
| 12   | 2      | 1, 6, 9, 12                    | 26   | 2      | 5, 13, 14                         |

|    |   |                        |    |   |                       |
|----|---|------------------------|----|---|-----------------------|
| 12 | 3 | 3, 7, 14               | 26 | 3 | 2, 4, 6               |
| 13 | 1 | 2, 3, 5, 9, 12, 13, 15 | 27 | 1 | 1, 2, 6, 7, 8, 12, 14 |
| 13 | 2 | 1, 4                   | 27 | 2 | 3, 4                  |
| 13 | 3 | 14                     | 27 | 3 | 5                     |
| 14 | 1 | 3, 4, 10, 11, 13       | 28 | 1 | 5, 6, 9, 10, 11, 15   |
| 14 | 2 | 4, 11                  | 28 | 2 | 1, 2, 14              |
| 14 | 3 | 7                      | 28 | 3 | 7                     |

**S2 Blood collection nurse work date**

| Nurse number | 1 | 2 | 3 | 4 | 5 | 6 | 7 | 8 | 9 | 1 | 1 | 1 | 1 | 1 | 1 | 1 | 1 | 1 | 2 |   |
|--------------|---|---|---|---|---|---|---|---|---|---|---|---|---|---|---|---|---|---|---|---|
|              |   |   |   |   |   |   |   |   |   | 0 | 1 | 2 | 3 | 4 | 5 | 6 | 7 | 8 | 9 | 0 |
| Date         | 1 | 2 | 2 | 1 | 1 | 1 | 2 | 1 | 2 | 1 | 1 | 2 | 1 | 2 | 2 | 3 | 1 | 3 | 9 | 1 |
|              | 2 | 3 | 3 | 2 | 2 | 2 | 3 | 2 | 3 | 3 | 2 | 4 | 3 | 4 | 3 | 5 | 5 | 8 | 1 | 3 |
|              |   |   |   |   |   |   |   |   |   |   |   |   |   |   |   |   |   |   | 2 |   |
|              | 5 | 4 | 4 | 4 | 4 | 3 | 5 | 3 | 4 | 4 | 3 | 5 | 4 | 5 | 4 | 8 | 8 | 9 | 1 | 1 |
|              |   |   |   |   |   |   |   |   |   |   |   |   |   |   |   |   |   |   | 5 | 2 |
|              | 6 | 5 | 5 | 5 | 5 | 4 | 6 | 4 | 5 | 5 | 4 | 6 | 5 | 6 | 5 | 9 | 1 | 1 | 2 |   |
|              |   |   |   |   |   |   |   |   |   |   |   |   |   |   |   |   | 0 | 0 | 3 |   |
|              | 7 | 8 | 7 | 6 | 6 | 7 | 7 | 5 | 6 | 7 | 5 | 9 | 6 | 7 | 6 | 1 | 1 | 2 |   |   |
|              |   |   |   |   |   |   |   |   |   |   |   |   |   |   |   | 0 | 1 | 3 |   |   |
|              | 1 | 9 | 9 | 7 | 7 | 8 | 8 | 7 | 8 | 9 | 9 | 1 | 7 | 1 | 8 | 1 | 2 |   |   |   |
|              | 1 |   |   |   |   |   |   |   |   |   |   | 0 |   | 0 |   | 1 | 4 |   |   |   |
|              | 1 | 1 | 1 | 8 | 9 | 1 | 1 | 1 | 9 | 1 | 1 | 1 | 9 | 1 | 1 | 1 |   |   |   |   |
|              | 2 | 1 | 1 |   |   | 0 | 0 | 0 |   | 0 | 0 | 1 |   | 2 | 0 | 2 |   |   |   |   |
|              | 1 | 1 | 1 | 1 | 1 | 1 | 1 | 1 | 1 | 1 | 1 | 1 | 1 | 1 | 1 | 1 |   |   |   |   |
|              | 3 | 2 | 2 | 2 | 1 | 1 | 1 | 1 | 0 | 1 | 1 | 2 | 2 | 3 | 1 | 5 |   |   |   |   |
|              | 1 | 1 | 1 | 1 | 1 | 1 | 1 | 1 | 1 | 1 | 1 | 1 | 1 | 1 | 1 | 2 |   |   |   |   |
|              | 5 | 3 | 3 | 3 | 2 | 2 | 2 | 2 | 2 | 2 | 4 | 3 | 3 | 5 | 3 | 1 |   |   |   |   |
|              | 1 | 1 | 1 | 1 | 1 | 1 | 1 | 1 | 1 | 1 | 1 | 1 | 1 | 1 | 1 | 2 |   |   |   |   |
|              | 6 | 5 | 4 | 4 | 3 | 5 | 4 | 5 | 3 | 4 | 5 | 5 | 4 | 6 | 5 | 2 |   |   |   |   |
|              | 1 | 1 | 1 | 1 | 1 | 1 | 1 | 1 | 1 | 1 | 1 | 1 | 1 | 1 | 1 | 2 |   |   |   |   |
|              | 7 | 7 | 6 | 6 | 6 | 6 | 6 | 6 | 6 | 5 | 7 | 6 | 6 | 7 | 6 | 3 |   |   |   |   |
|              | 1 | 1 | 1 | 1 | 1 | 1 | 1 | 1 | 1 | 1 | 1 | 1 | 1 | 1 | 1 | 2 |   |   |   |   |
|              | 8 | 8 | 7 | 7 | 7 | 7 | 7 | 7 | 7 | 6 | 8 | 7 | 7 | 8 | 7 | 4 |   |   |   |   |
|              | 2 | 2 | 1 | 1 | 1 | 1 | 1 | 1 | 1 | 1 | 1 | 1 | 1 | 1 | 1 |   |   |   |   |   |
|              | 0 | 0 | 8 | 8 | 9 | 8 | 8 | 8 | 8 | 8 | 9 | 8 | 8 | 9 | 8 |   |   |   |   |   |
|              | 2 | 2 | 1 | 1 | 2 | 2 | 1 | 1 | 1 | 2 | 2 | 1 | 1 | 2 | 1 |   |   |   |   |   |
|              | 1 | 1 | 9 | 9 | 0 | 0 | 9 | 9 | 9 | 0 | 0 | 9 | 9 | 1 | 9 |   |   |   |   |   |
|              | 2 | 2 | 2 | 2 | 2 | 2 | 2 | 2 | 2 | 2 | 2 | 2 | 2 | 2 | 2 |   |   |   |   |   |
|              | 2 | 2 | 0 | 1 | 2 | 1 | 0 | 1 | 2 | 1 | 2 | 1 | 0 | 2 | 2 |   |   |   |   |   |
|              | 2 | 2 | 2 | 2 | 2 | 2 | 2 | 2 | 2 | 2 | 2 | 2 | 2 | 2 | 2 |   |   |   |   |   |
|              | 4 | 4 | 2 | 2 | 4 | 2 | 2 | 2 | 3 | 3 | 3 | 2 | 2 | 4 | 3 |   |   |   |   |   |
|              | 2 | 2 | 2 | 2 | 2 | 2 | 2 | 2 | 2 | 2 | 2 | 2 | 2 | 2 | 2 |   |   |   |   |   |
|              | 5 | 5 | 3 | 4 | 5 | 3 | 4 | 3 | 4 | 4 | 4 | 4 | 3 | 5 | 4 |   |   |   |   |   |

|   |   |   |   |   |   |   |   |   |   |   |   |   |   |   |
|---|---|---|---|---|---|---|---|---|---|---|---|---|---|---|
| 2 | 2 | 2 | 2 | 2 | 2 | 2 | 2 | 2 | 2 | 2 | 2 | 2 | 2 | 2 |
| 6 | 6 | 4 | 5 | 6 | 6 | 6 | 4 | 5 | 5 | 5 | 5 | 4 | 6 | 5 |
| 2 | 2 | 2 | 2 | 2 | 2 | 2 | 2 | 2 | 2 | 2 | 2 | 2 | 2 | 2 |
| 7 | 7 | 6 | 6 | 7 | 7 | 7 | 5 | 6 | 6 | 6 | 6 | 5 | 7 | 6 |
| 2 | 2 | 2 | 2 | 2 | 2 | 2 | 2 | 2 | 2 | 2 | 2 | 2 | 2 | 2 |
| 8 | 8 | 7 | 7 | 8 | 8 | 8 | 7 | 8 | 8 | 8 | 7 | 6 | 8 | 8 |

---
